# Supplementary material
Source: Springer Nature journal article supplement (https://www.springermedizin.de/resource/supplementary/12873_2010_110_MOESM3_ESM.pdf/9431442)

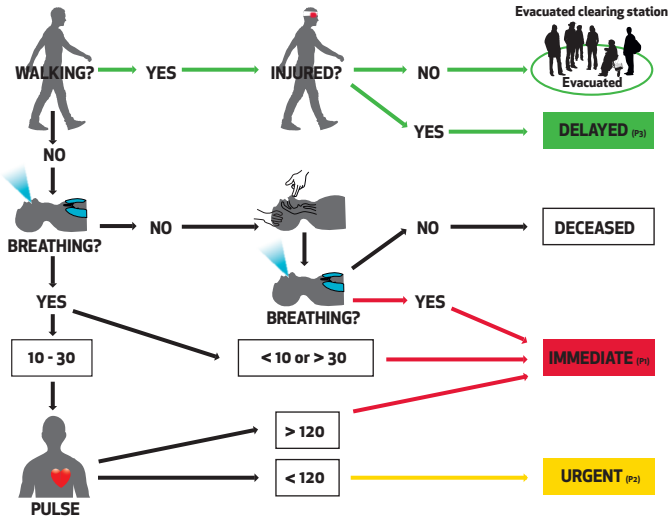

Supplement: MOESM3 [file 9431442]
